# Supplementary material for: Microarray Approach Combined with ddPCR: An Useful Pipeline for the Detection and Quantification of Circulating Tumour DNA Mutations
Source: PubMed Central journal article supplement (PMC6721623; doi:10.3390/cells8080769), 2019-07-24
Supplement: cells-08-00769-s001.pdf [file cells-08-00769-s001.pdf]

**Table 1 Supplemental data. Specific ddPCR Assay ID.**

| Gene           | Nucleotide Mutation | Aminoacid change | Assay ID (wild-type sequence) | Assay ID (mutated sequence) |
|----------------|---------------------|------------------|-------------------------------|-----------------------------|
| KRAS (exon 2)  | c.34G>T             | p.G12C           | dHsaCP2500585                 | dHsaCP2500584               |
|                | c.35G>A             | p.G12D           | dHsaCP2500597                 | dHsaCP2500596               |
|                | c.34G>C             | p.G12R           | dHsaCP2500591                 | dHsaCP2500590               |
|                | c.34G>A             | p.G12S           | dHsaCP2500589                 | dHsaCP2500588               |
|                | c.38G>A             | p.G13D           | dHsaCP2500599                 | dHsaCP2500598               |
| KRAS (exon 4)  | c.436G>A            | p.A146T          | dHsaCP2000080                 | dHsaCP2000079               |
| BRAF (exon 15) | c.1799T>A           | p.V600E          | dHsaCP2000028                 | dHsaCP2000027               |
